# Supplementary material for: Dicyandiamide-assisted synthesis of N-doped porous CoMn–Nx@N–C carbon nanotube compositesviaMOFs as efficient trifunctional electrocatalysts in the same electrolyte
Source: Royal Society of Chemistry journal article supplement (doi:10.1039/d2nr05254g), 2022-12-08
Supplement: d2nr05254g1.pdf [file d2nr05254g1.pdf]

## Electronic Supporting Information

### **Dicyandiamide assisted synthesized N-doped porous CoMn-N<sub>x</sub>@N-C carbon nanotube composites via MOFs as efficient trifunctional electrocatalysts in the same electrolyte**

Shiang Li <sup>a</sup>, Chao Feng <sup>a, b\*</sup>, Yuehong Xie <sup>a</sup>, Changyan Guo <sup>a\*</sup>, Afaq Hassan <sup>a</sup>, Jide Wang <sup>a\*</sup>

<sup>a</sup> *Key Laboratory of Oil and Gas Fine Chemicals, Ministry of Education & Xinjiang Uygur Autonomous Region, College of Chemistry and Chemical Engineering, Xinjiang University, Urumqi, Xinjiang 830046, China*

<sup>b</sup> *Ansteel Research Institute of Vanadium&Titanium (Iron&Steel)*

\*Corresponding author: Jide Wang, E-mail: awangjd@sina.cn; Changyan Guo, E-mail: gcysl@xju.edu.cn; Chao Feng, E-mail: afengc@sina.com

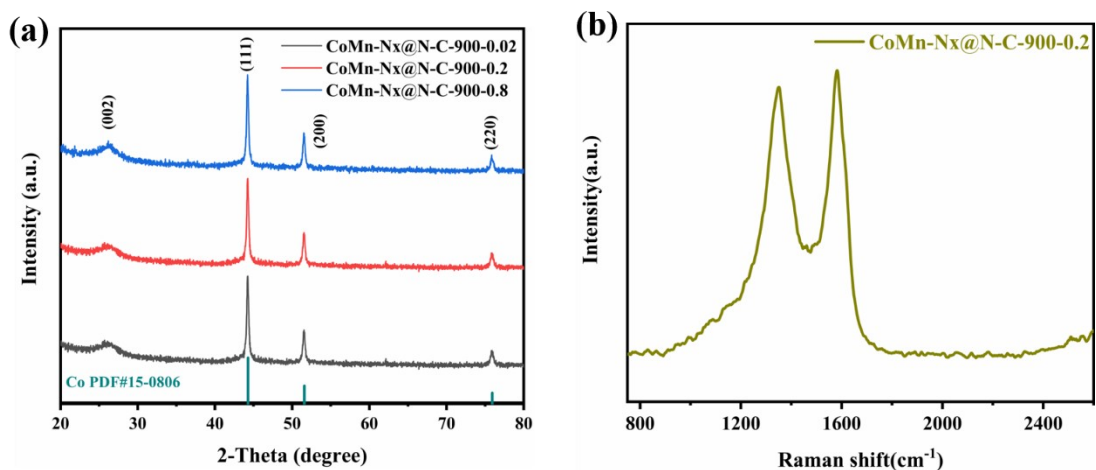

**Fig. S1.** (a) XRD spectra of CoMn-Nx@N-C-900-0.02, CoMn-Nx@N-C-900-0.2 and CoMn-Nx@N-C-900-0.8 nanocomposites; (b) Raman spectra of CoMn-Nx@N-C-900-0.2.

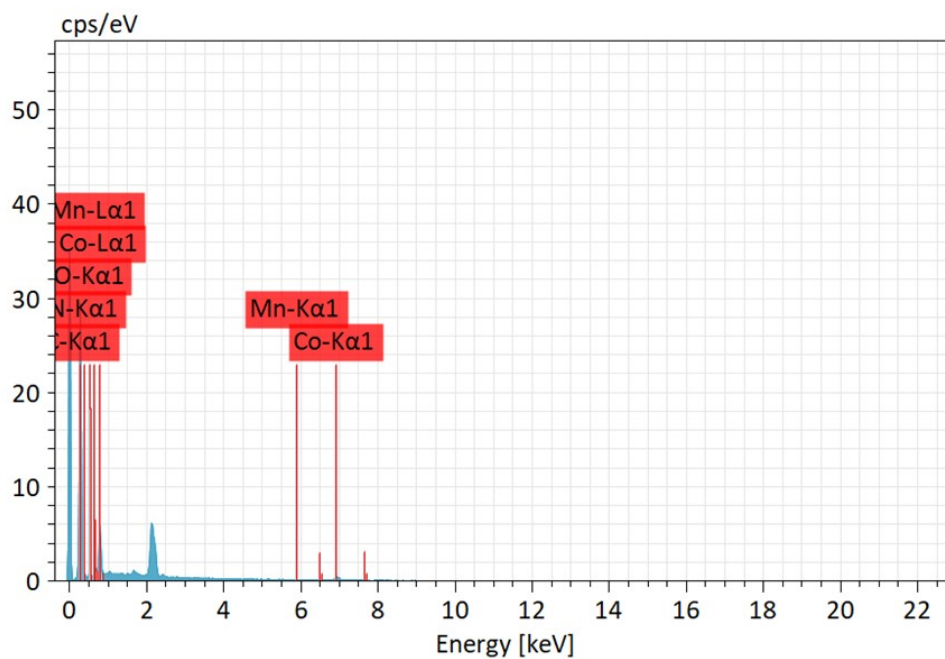

**Fig. S2.** The EDS spectra of CoMn-Nx@N-C-900-0.2.

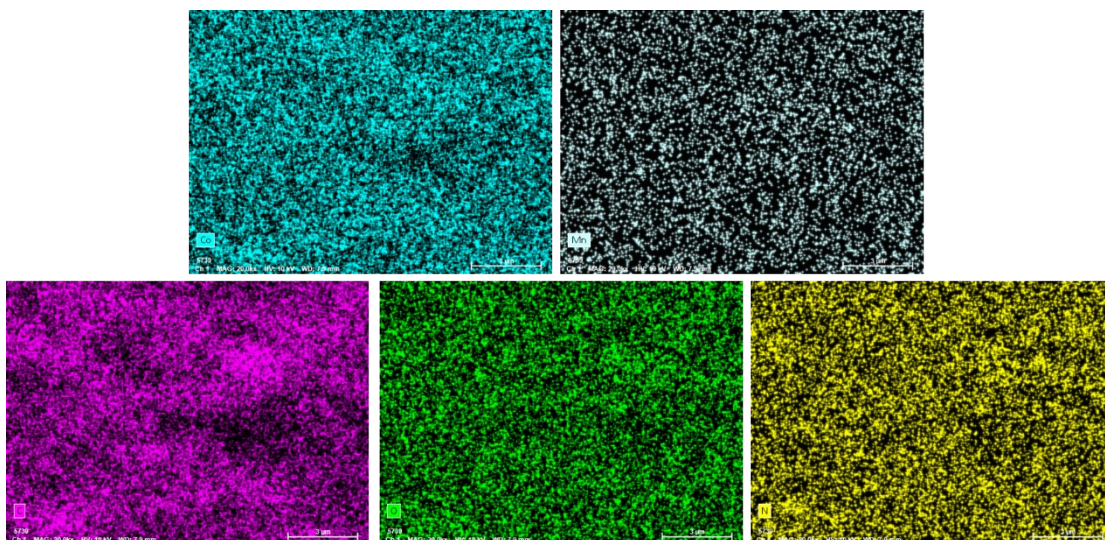

**Fig. S3.** elemental mapping images of CoMn-Nx@N-C-900-0.2.

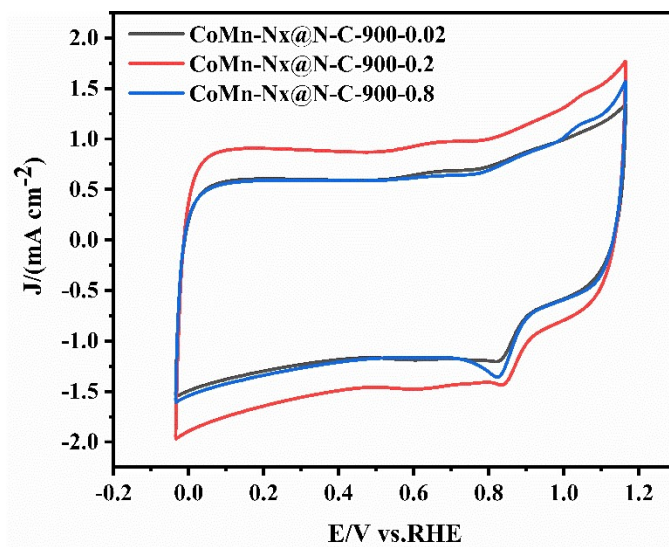

**Fig. S4.** CV curves of CoMn-Nx@N-C-900-0.02, CoMn-Nx@N-C-900-0.2 and CoMn-Nx@N-C-900-0.8 nanocomposites in 0.1 KOH.

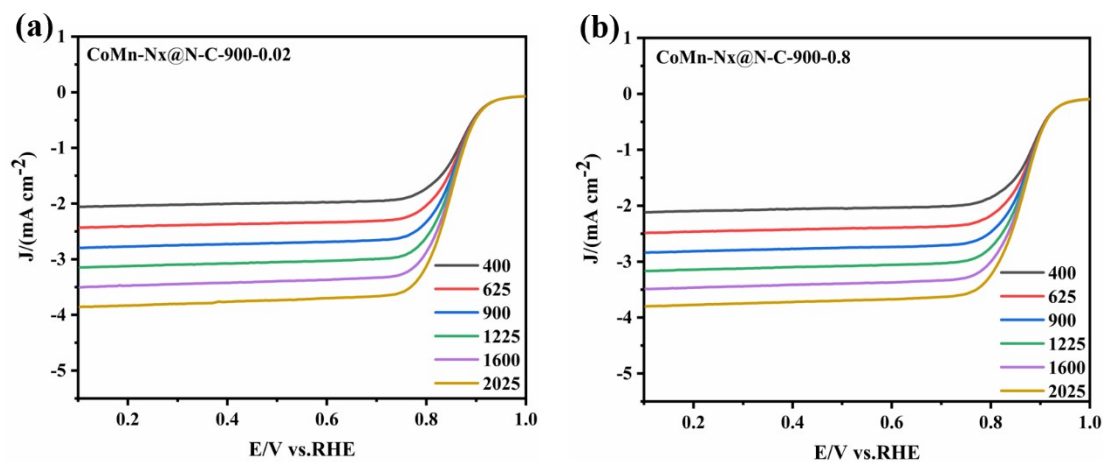

**Fig. S5.** LSV diagram of CoMn-Nx@N-C at different rotation rates of (a) CoMn-Nx@N-C-900-0.02; (b) CoMn-Nx@N-C-900-0.8.

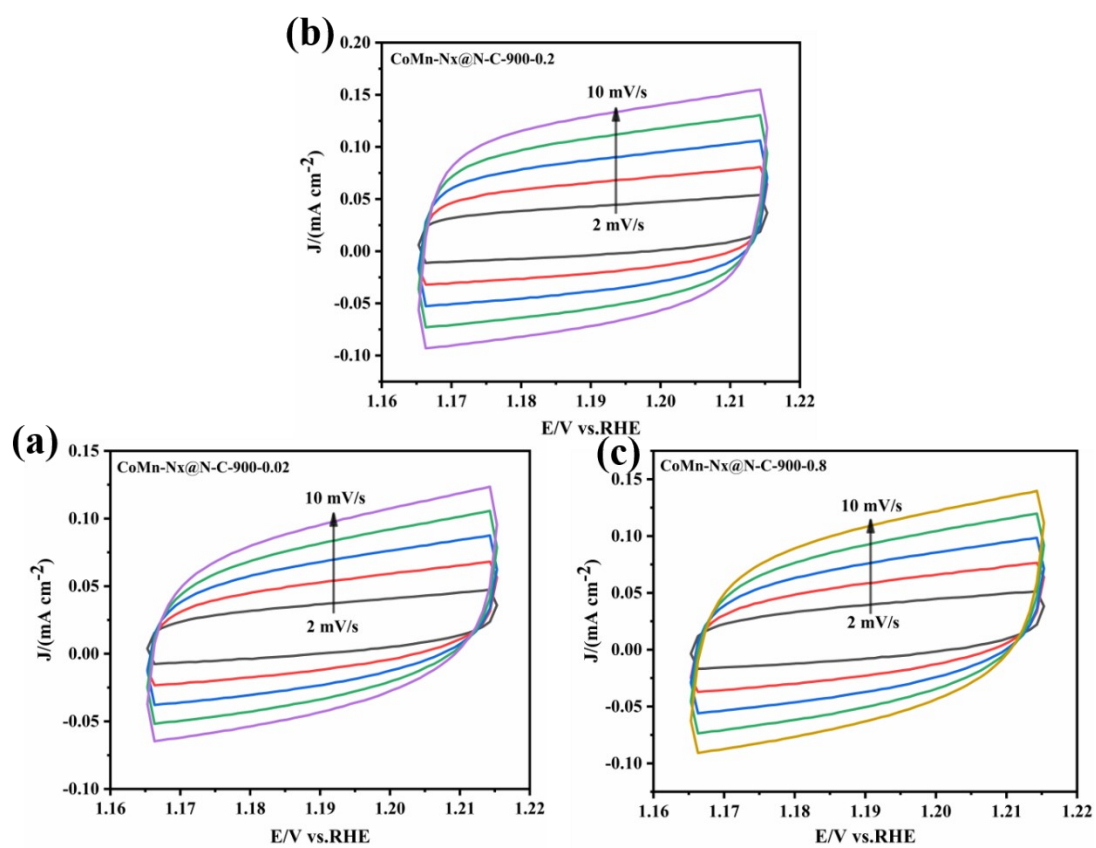

**Fig. S6.** CV curves measured at different scan rates from 2 to 10  $\text{mV s}^{-1}$  of (a) CoMn-Nx@N-C-900-0.02; (b) CoMn-Nx@N-C-900-0.2; (c) CoMn-Nx@N-C-900-0.8.

**Table S1.** Summary of Porosity Parameters of CoMn-Nx@N-C-900-0.2.

| Electrocatalyst     | BET SSA<br>(m <sup>2</sup> g <sup>-1</sup> ) | Pore volume<br>(cm <sup>3</sup> g <sup>-1</sup> ) |
|---------------------|----------------------------------------------|---------------------------------------------------|
| CoMn-Nx@N-C-900-0.2 | 134.50                                       | 0.265                                             |
